# Supplementary material
Source: PubMed Central journal article supplement (PMC2393774)

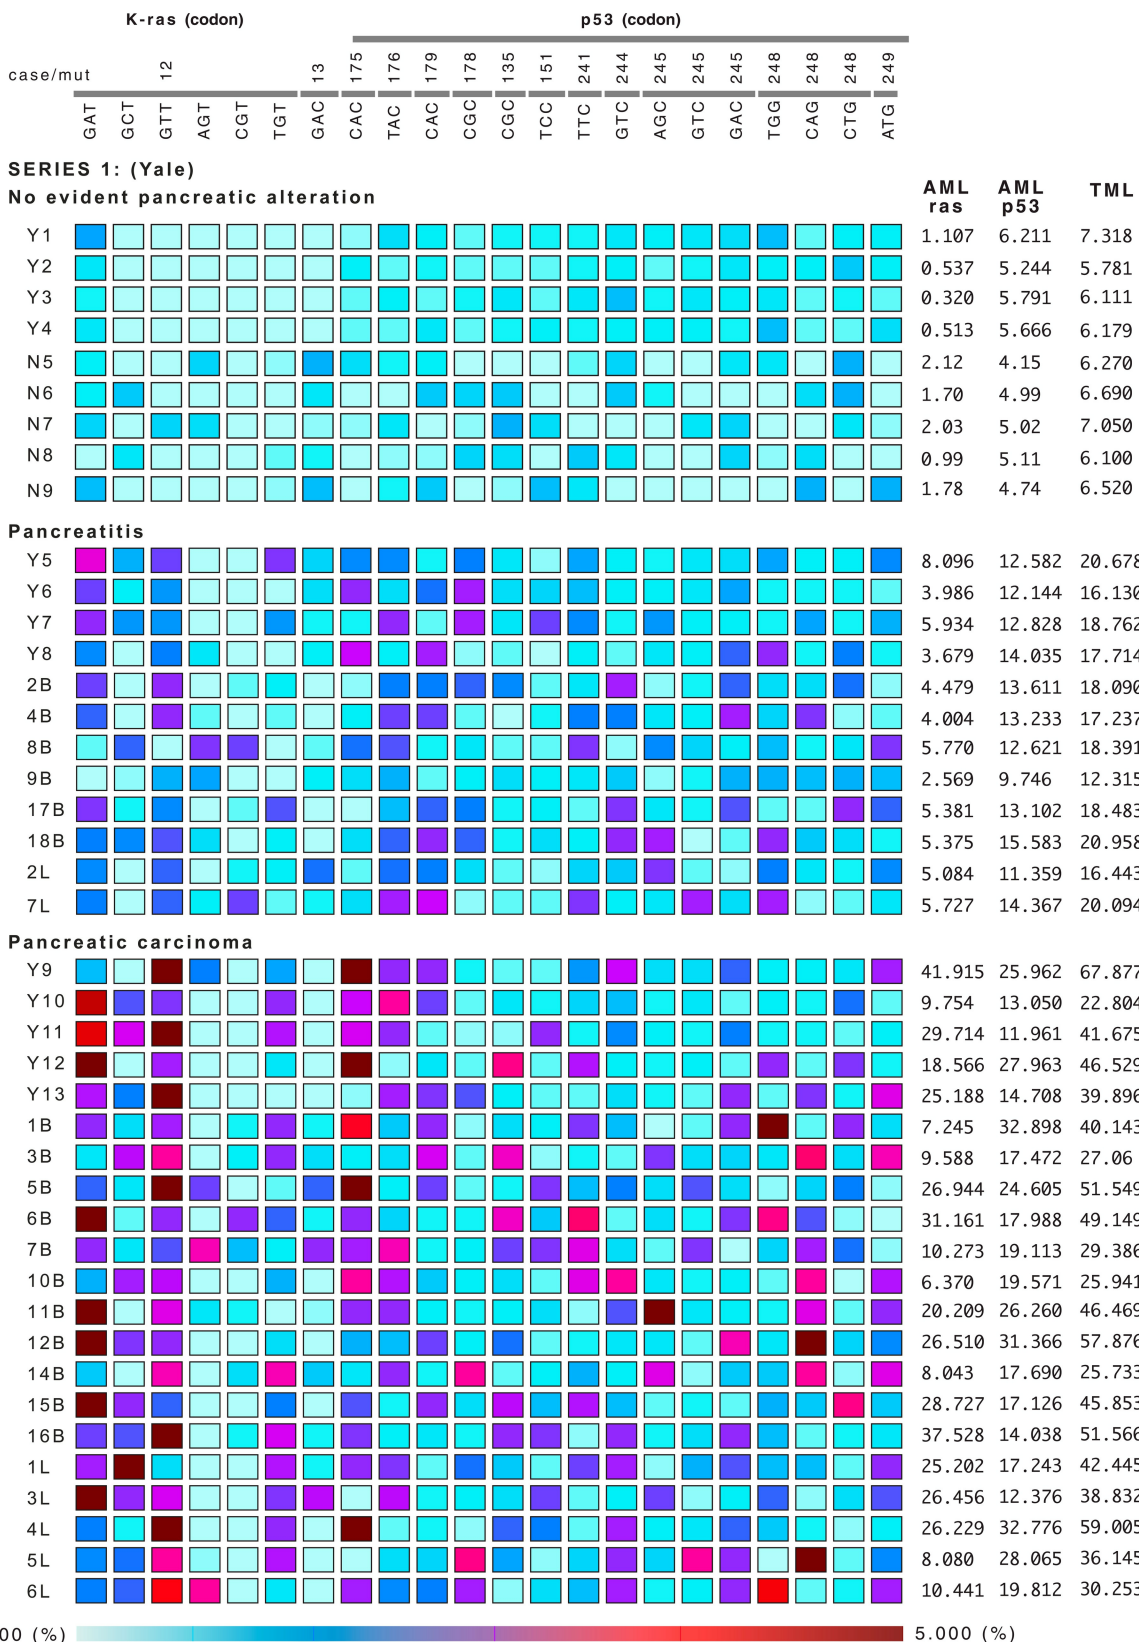

Supplement: pnas_0708250105_1.pdf [file pnas_0708250105_1.pdf]

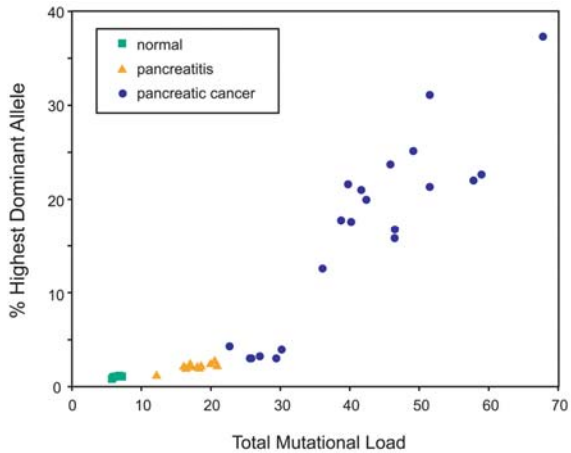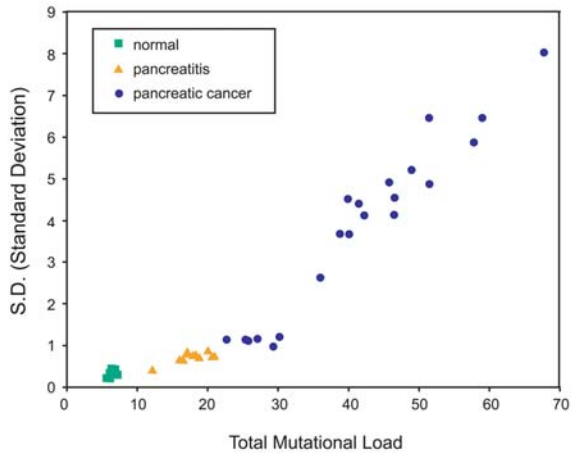

Supplement: pnas_0708250105_2.pdf [file pnas_0708250105_2.pdf]

# Time to tumor development by disturbance interval

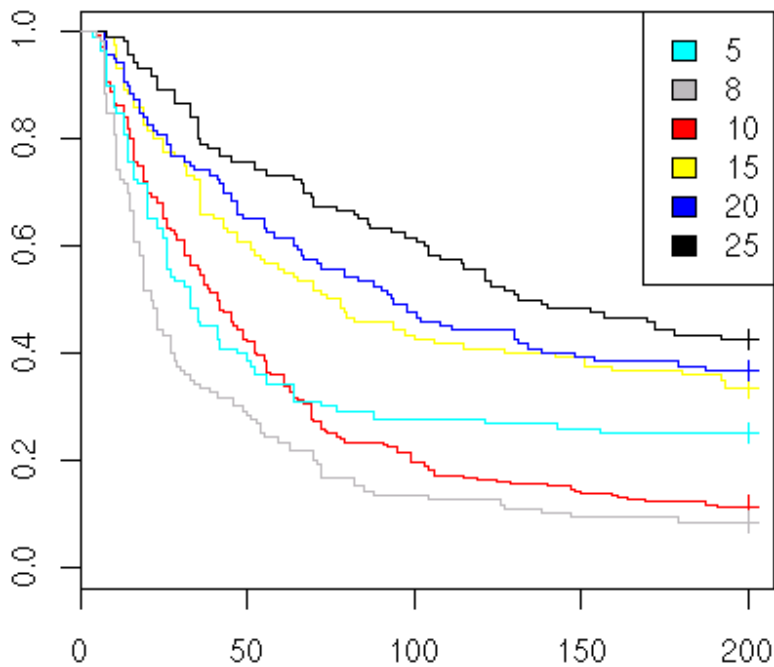

(mutation rate:0.005)

Supplement: pnas_0708250105_4.pdf [file pnas_0708250105_4.pdf]

# Time to tumor: by disturbance intensity

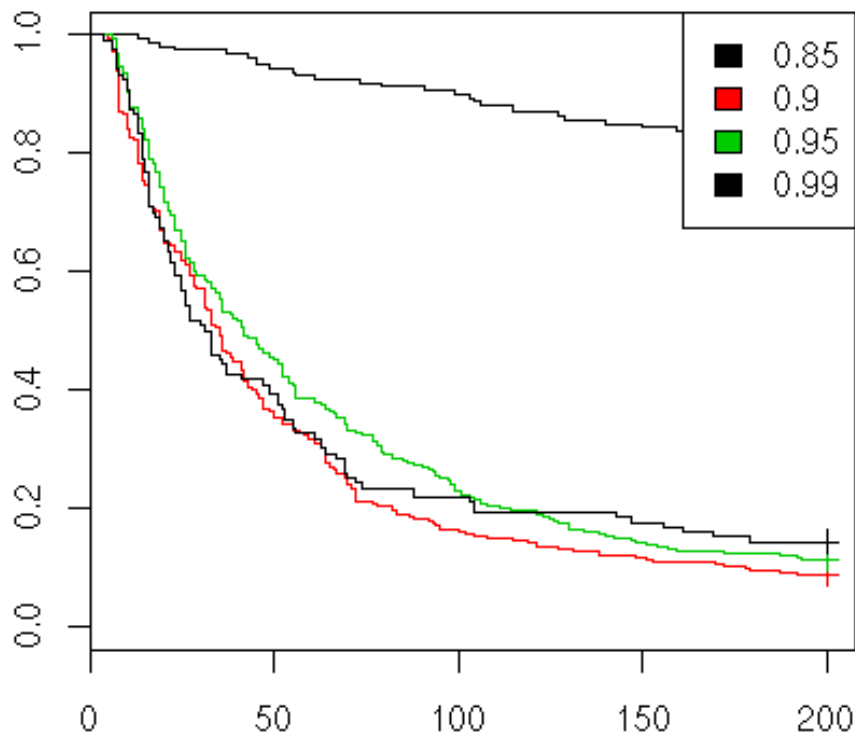

(mutation rate:0.005)

Supplement: pnas_0708250105_5.pdf [file pnas_0708250105_5.pdf]

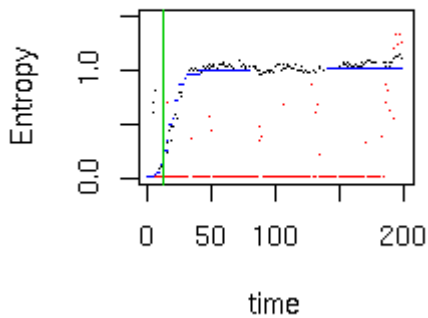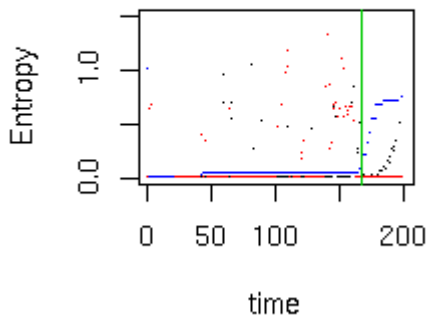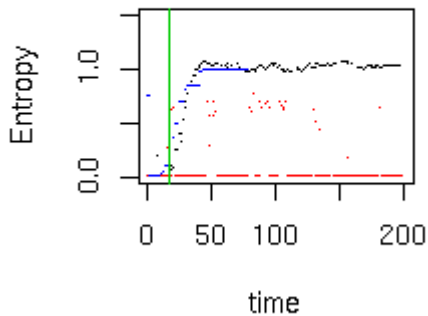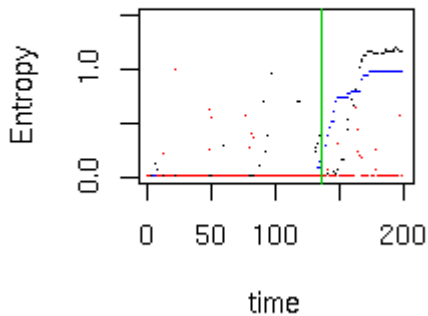

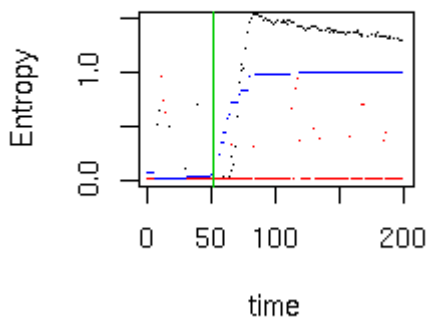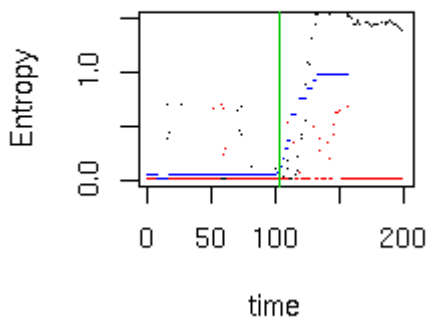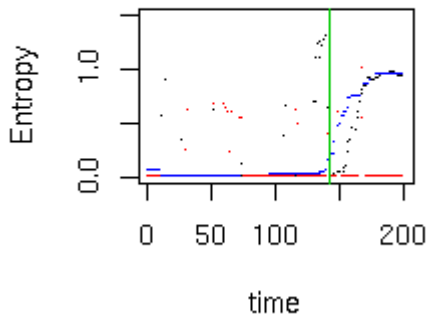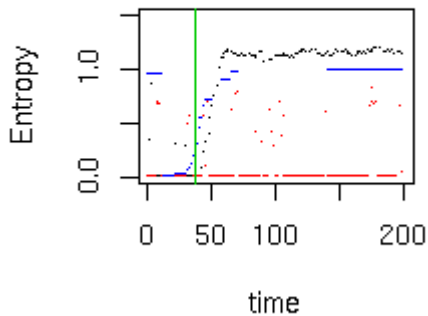

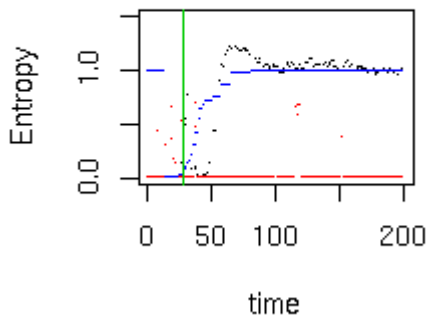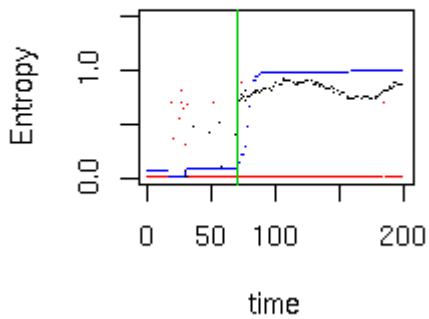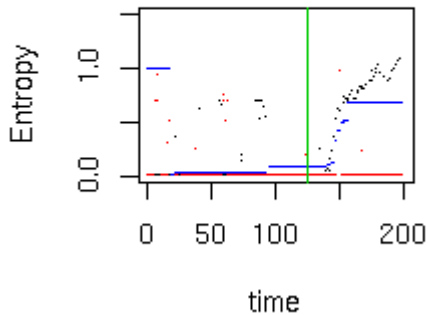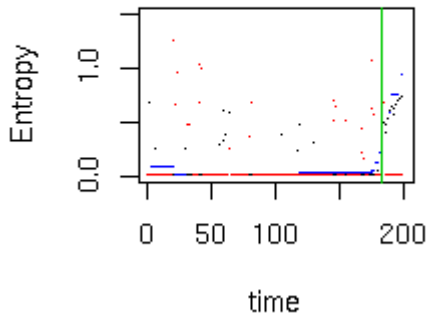

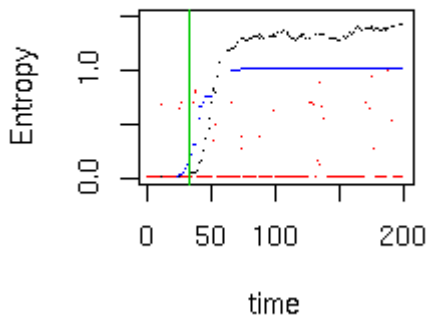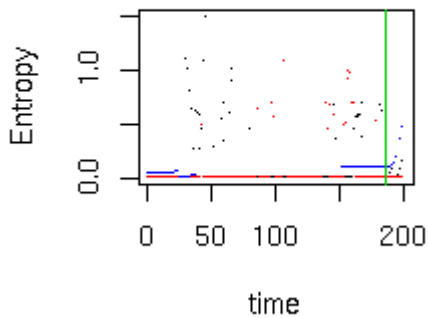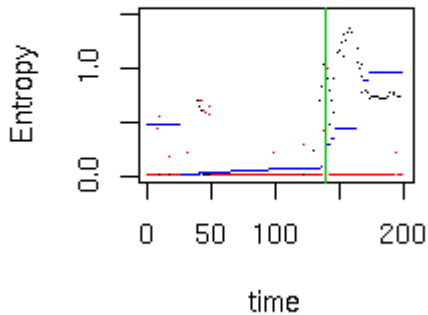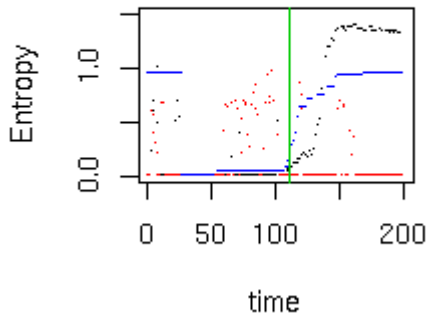

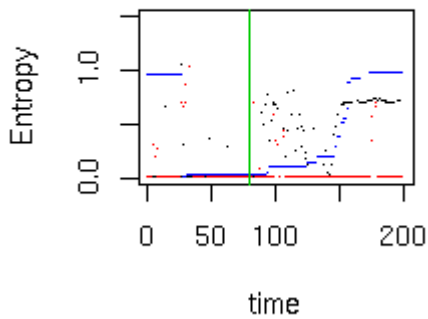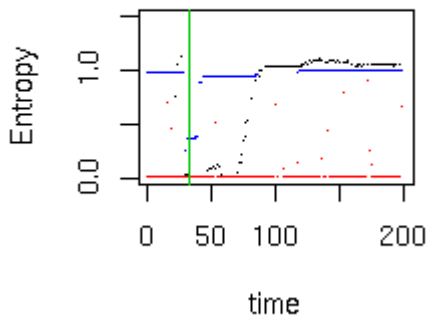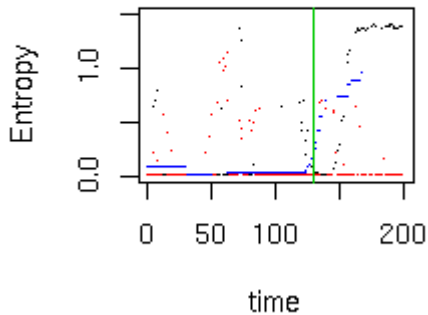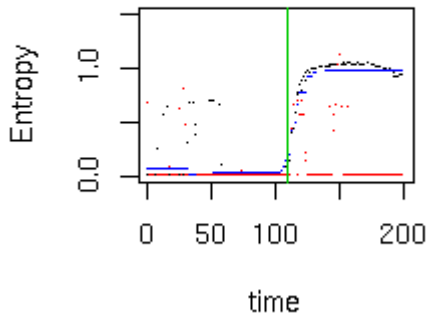

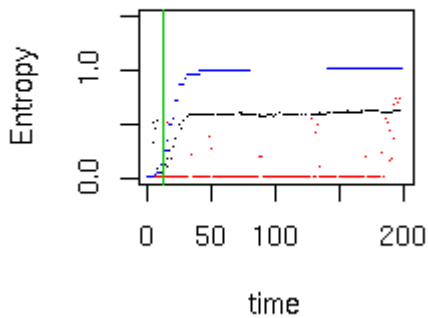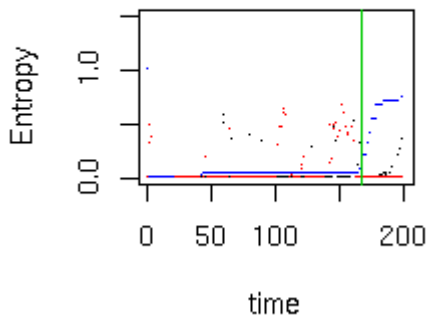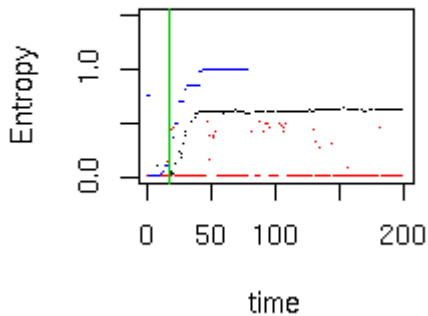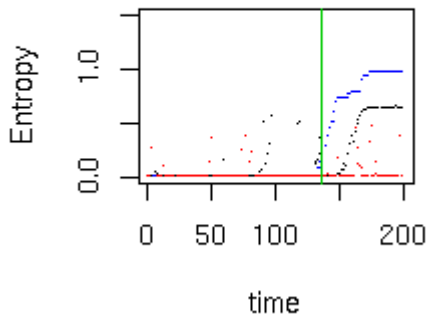

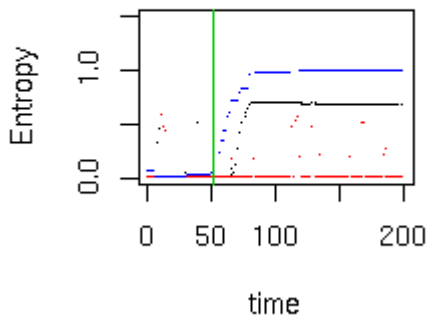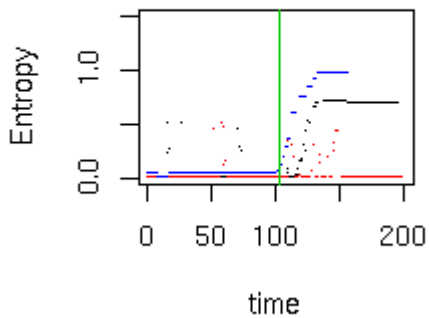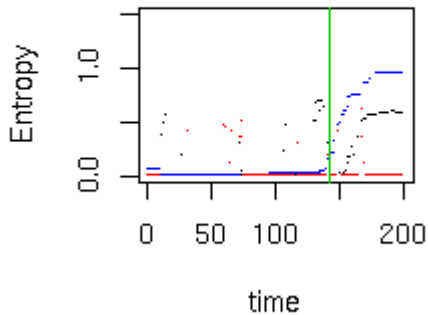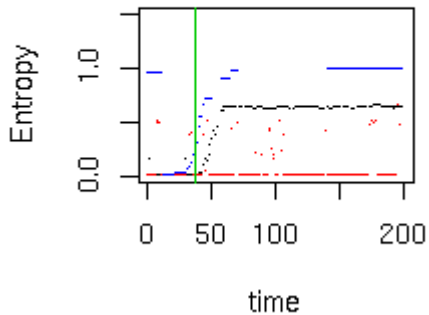

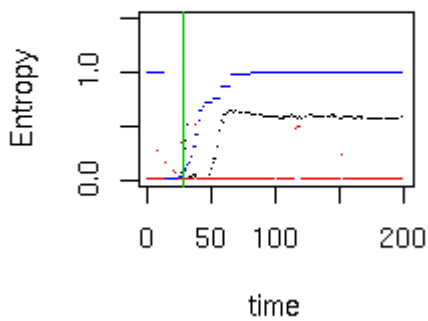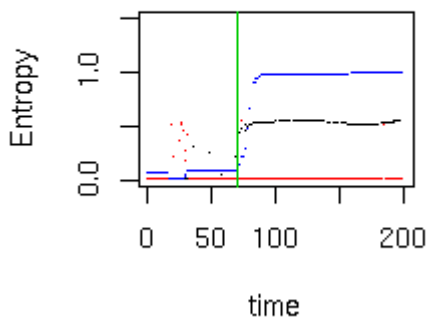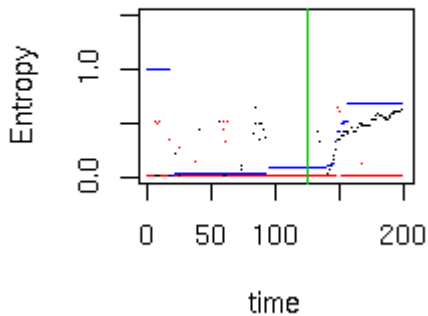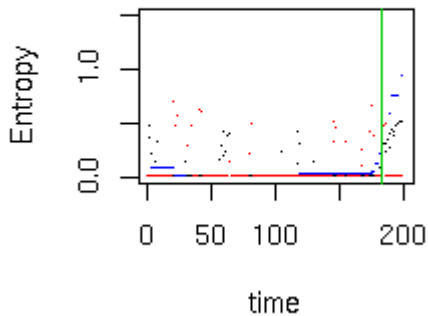



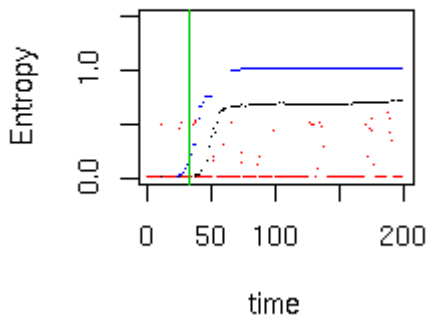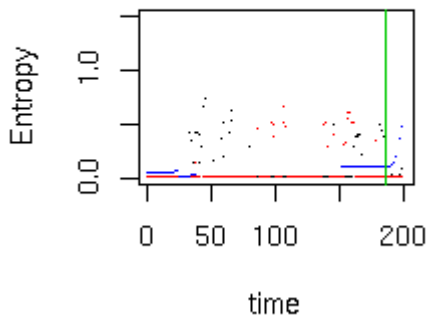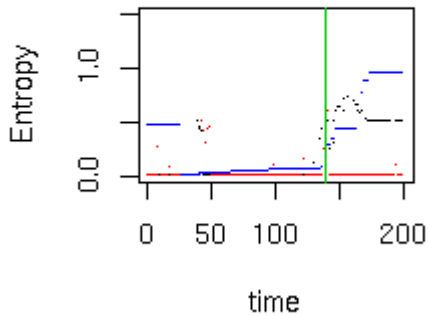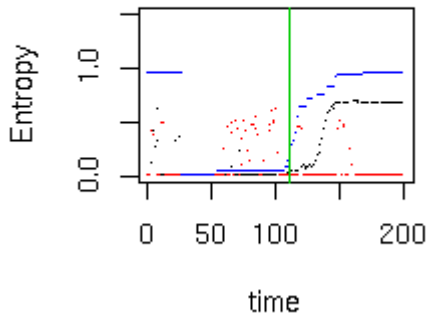

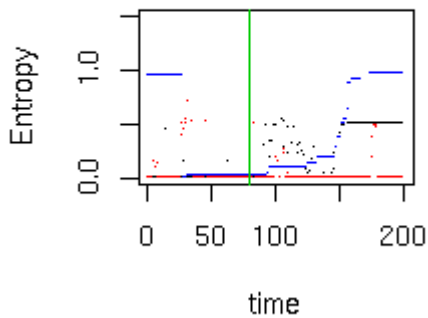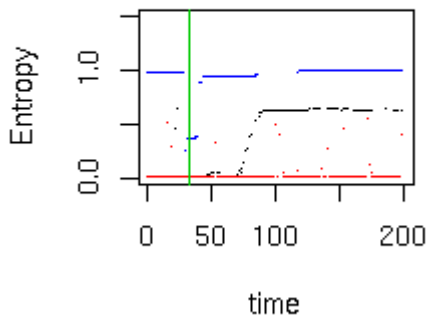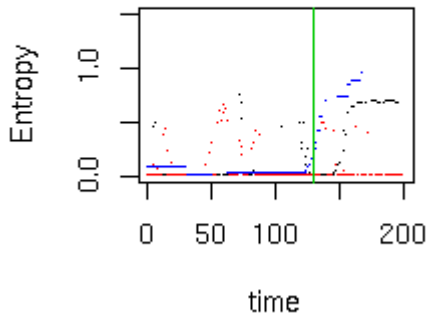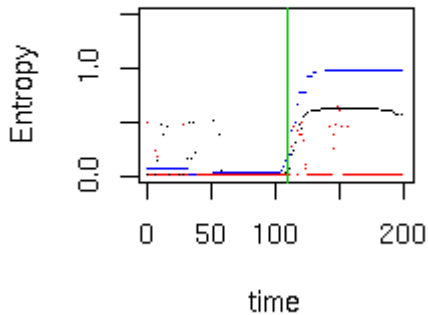

Supplement: pnas_0708250105_6.pdf [file pnas_0708250105_6.pdf]
